# Supplementary material for: Associations of rumen and rectum bacteria with the sustained productive performance of dairy cows
Source: Front Microbiol. 2025 Apr 29;16:1565034. doi: 10.3389/fmicb.2025.1565034 (PMC12069273; doi:10.3389/fmicb.2025.1565034)
Supplement: Supplementary file 2 [file Table_1.xlsx]

## Sheet: Table S1 
Table S1. Ingredients of the basal diet (%, DM basis).
Item	Percent
Alfalfa	4.31
Corn silage	51.26
Whole cottonseed	2.46
Corn grain, ground	6.56
Flaked corn	4.92
Beet pellets	1.23
Soybean meal-CL	7.38
Extruded soybeans	1.64
Corn gluten meal CP60%	0.51
Rapeseed meal	0.88
DDGS-CL	2.05
Calcium fatty acids	0.62
Sodium bicarbonate	0.62
Urea	0.14
Water	14.35
Premix2 (lactation period)	1.07
Nutrient level
Dry matter	55.8
Crude protein	16.35
Starch	18.5
Neutral detergent fiber	32.1
Acid detergent fiber	18.45
Ca	1
P	0.4
Each kilogram of premix dry matter contains vitamin A 134.57 kIU, vitamin D 36.77 kIU, vitamin E 825.85 IU, Fe 985.97 mg, Cu 183.77 mg, Zn 919.99 mg, Mn 915.14 mg, Se 7.36 mg, and Co 13.80 mg.

## Sheet: Table S2 
Table S2. Catalogue numbers of the reagent kits used in this study.
Name	Catalog number
TP	#JH00002
ALB	#JH00003
GLB	#JH00021
ALT	#JH00061
AST	#JH00062
ALP	#JH00103
TBA	#JH00073
γ-GGT	#JH00087
BUN	#JH00032
CRE	#JH00036
LDH	#JH00063
GLU	#JH00001
TC	#JH00028
TG	#JH00029
HDL-C	#JH00021
LDL-C	#JH00022
IgG	#JH00013
IgA	#JH00014
SOD	#JH00325
GPx	#JH00332
T-AOC	#JH00346
T-GSH	#JH00328
CAT	#JH00340
NEFA	#KS13726
BHB	#KS12238
HPT	#KS13587
SAA	#KS11492
TNF-α	#H052-1-2
IL-1β	#H002-1-2
IL-6	#H007-1-2
IL-10	#H009-1-2
MDA	#A003-1-2
PC	#BC1270

## Sheet: Table S3
Table S3. Correlation analysis between Alpha index and phenotypes.
Region	Taxa	Alpha diversity	Indicators	Spearman's correlation	P-value
Rumen	ASV	Chao1	MY	-0.62	0
			MF	0.02	0.95
			MP	0.3	0.2
			ML	0.22	0.36
			ECM	-0.58	0.01
			% 3.5 FCM	-0.6	0.01
			DMI	-0.33	0.16
			MFY	-0.58	0.01
			MPY	-0.6	0.01
			FE	-0.52	0.02
			RpH	0.68	0
			BCS	-0.2	0.4
		ACE	MY	-0.64	0
			MF	0.01	0.97
			MP	0.29	0.21
			ML	0.21	0.37
			ECM	-0.6	0.01
			% 3.5 FCM	-0.61	0.01
			DMI	-0.33	0.16
			MFY	-0.59	0.01
			MPY	-0.61	0.01
			FE	-0.54	0.02
			RpH	0.69	0
			BCS	-0.2	0.41
		Shannon	MY	-0.55	0.01
			MF	0.11	0.65
			MP	0.15	0.52
			ML	0.13	0.58
			ECM	-0.46	0.04
			% 3.5 FCM	-0.45	0.05
			DMI	-0.2	0.4
			MFY	-0.43	0.06
			MPY	-0.52	0.02
			FE	-0.48	0.03
			RpH	0.61	0
			BCS	-0.31	0.18
		Simpson	MY	0.5	0.03
			MF	-0.04	0.87
			MP	-0.14	0.57
			ML	-0.11	0.65
			ECM	0.41	0.07
			% 3.5 FCM	0.4	0.08
			DMI	0.22	0.35
			MFY	0.38	0.1
			MPY	0.46	0.04
			FE	0.42	0.06
			RpH	-0.53	0.02
			BCS	0.32	0.17
	Phylum	Chao1	MY	-0.61	0
			MF	-0.29	0.21
			MP	-0.2	0.39
			ML	-0.3	0.2
			ECM	-0.58	0.01
			% 3.5 FCM	-0.57	0.01
			DMI	-0.27	0.25
			MFY	-0.57	0.01
			MPY	-0.62	0
			FE	-0.66	0
			RpH	0.55	0.01
			BCS	-0.07	0.77
		ACE	MY	-0.56	0.01
			MF	-0.36	0.12
			MP	-0.2	0.41
			ML	-0.28	0.22
			ECM	-0.52	0.02
			% 3.5 FCM	-0.51	0.02
			DMI	-0.27	0.25
			MFY	-0.53	0.02
			MPY	-0.54	0.01
			FE	-0.6	0.01
			RpH	0.44	0.05
			BCS	0.02	0.93
		Shannon	MY	0.18	0.44
			MF	-0.19	0.43
			MP	-0.3	0.19
			ML	-0.4	0.08
			ECM	0.07	0.77
			% 3.5 FCM	0.07	0.78
			DMI	-0.09	0.7
			MFY	0.08	0.72
			MPY	0.15	0.53
			FE	0.19	0.43
			RpH	-0.13	0.57
			BCS	0.17	0.49
		Simpson	MY	-0.25	0.28
			MF	0.07	0.77
			MP	0.27	0.24
			ML	0.39	0.09
			ECM	-0.14	0.54
			% 3.5 FCM	-0.14	0.55
			DMI	0.13	0.58
			MFY	-0.18	0.44
			MPY	-0.22	0.36
			FE	-0.29	0.21
			RpH	0.15	0.54
			BCS	-0.16	0.5
	Family	Chao1	MY	-0.11	0.64
			MF	0.15	0.54
			MP	-0.37	0.11
			ML	-0.19	0.41
			ECM	-0.1	0.68
			% 3.5 FCM	-0.06	0.79
			DMI	-0.01	0.97
			MFY	0.01	0.96
			MPY	-0.18	0.44
			FE	0	0.98
			RpH	0.2	0.39
			BCS	0.08	0.74
		ACE	MY	-0.1	0.67
			MF	0.15	0.54
			MP	-0.37	0.11
			ML	-0.19	0.42
			ECM	-0.1	0.69
			% 3.5 FCM	-0.06	0.79
			DMI	0	0.99
			MFY	0.01	0.98
			MPY	-0.18	0.45
			FE	0	0.99
			RpH	0.2	0.41
			BCS	0.13	0.59
		Shannon	MY	-0.16	0.51
			MF	0.23	0.33
			MP	0.04	0.87
			ML	0.15	0.53
			ECM	-0.13	0.59
			% 3.5 FCM	-0.11	0.64
			DMI	0.07	0.76
			MFY	-0.08	0.72
			MPY	-0.17	0.48
			FE	-0.12	0.63
			RpH	0.22	0.35
			BCS	-0.05	0.85
		Simpson	MY	0.08	0.75
			MF	-0.27	0.25
			MP	-0.04	0.86
			ML	-0.17	0.48
			ECM	0.04	0.87
			% 3.5 FCM	0.02	0.92
			DMI	-0.11	0.64
			MFY	0	0.99
			MPY	0.09	0.7
			FE	0.04	0.86
			RpH	-0.15	0.53
			BCS	0.04	0.87
	Genus	Chao1	MY	-0.25	0.29
			MF	0.21	0.38
			MP	-0.26	0.27
			ML	-0.05	0.82
			ECM	-0.19	0.43
			% 3.5 FCM	-0.18	0.44
			DMI	-0.25	0.29
			MFY	-0.07	0.78
			MPY	-0.28	0.23
			FE	0	0.99
			RpH	0.4	0.08
			BCS	-0.14	0.56
		ACE	MY	-0.19	0.41
			MF	0.21	0.38
			MP	-0.29	0.21
			ML	-0.1	0.66
			ECM	-0.15	0.53
			% 3.5 FCM	-0.14	0.55
			DMI	-0.19	0.41
			MFY	-0.03	0.89
			MPY	-0.25	0.3
			FE	0.03	0.91
			RpH	0.35	0.13
			BCS	-0.09	0.71
		Shannon	MY	-0.09	0.7
			MF	0.28	0.23
			MP	-0.01	0.96
			ML	0.13	0.59
			ECM	-0.04	0.87
			% 3.5 FCM	-0.01	0.96
			DMI	0	0.99
			MFY	0.04	0.87
			MPY	-0.09	0.7
			FE	0.04	0.88
			RpH	0.21	0.38
			BCS	-0.06	0.79
		Simpson	MY	0.12	0.62
			MF	-0.25	0.29
			MP	0.07	0.78
			ML	-0.11	0.64
			ECM	0.06	0.81
			% 3.5 FCM	0.03	0.89
			DMI	0.04	0.86
			MFY	-0.03	0.91
			MPY	0.12	0.62
			FE	-0.03	0.9
			RpH	-0.23	0.34
			BCS	-0.04	0.87
	Species	Chao1	MY	-0.27	0.26
			MF	0.24	0.32
			MP	0.12	0.62
			ML	0.23	0.33
			ECM	-0.2	0.39
			% 3.5 FCM	-0.22	0.36
			DMI	-0.2	0.39
			MFY	-0.14	0.56
			MPY	-0.25	0.29
			FE	-0.09	0.72
			RpH	0.48	0.03
			BCS	-0.29	0.21
		ACE	MY	-0.27	0.24
			MF	0.23	0.33
			MP	0.13	0.59
			ML	0.24	0.31
			ECM	-0.21	0.36
			% 3.5 FCM	-0.22	0.34
			DMI	-0.22	0.35
			MFY	-0.14	0.54
			MPY	-0.25	0.28
			FE	-0.08	0.74
			RpH	0.49	0.03
			BCS	-0.27	0.24
		Shannon	MY	-0.03	0.89
			MF	0.29	0.21
			MP	-0.01	0.96
			ML	0.13	0.58
			ECM	0.02	0.93
			% 3.5 FCM	0.04	0.87
			DMI	0.03	0.91
			MFY	0.09	0.69
			MPY	-0.03	0.89
			FE	0.09	0.7
			RpH	0.15	0.53
			BCS	-0.14	0.56
		Simpson	MY	-0.01	0.96
			MF	-0.24	0.31
			MP	0.08	0.75
			ML	-0.11	0.65
			ECM	-0.06	0.81
			% 3.5 FCM	-0.07	0.76
			DMI	0.02	0.92
			MFY	-0.14	0.54
			MPY	-0.02	0.94
			FE	-0.18	0.45
			RpH	-0.09	0.71
			BCS	0.03	0.9
Rectum	ASV	Chao1	MY	0.28	0.24
			MF	0.26	0.26
			MP	-0.34	0.14
			ML	-0.13	0.59
			ECM	0.32	0.17
			% 3.5 FCM	0.32	0.17
			DMI	0.39	0.09
			MFY	0.37	0.11
			MPY	0.21	0.38
			FE	0.27	0.24
			BCS	0.11	0.64
		ACE	MY	0.28	0.23
			MF	0.27	0.25
			MP	-0.34	0.14
			ML	-0.12	0.6
			ECM	0.32	0.17
			% 3.5 FCM	0.32	0.16
			DMI	0.4	0.08
			MFY	0.38	0.1
			MPY	0.21	0.37
			FE	0.28	0.23
			BCS	0.11	0.66
		Shannon	MY	0.04	0.87
			MF	0.39	0.09
			MP	-0.25	0.29
			ML	-0.05	0.84
			ECM	0.11	0.66
			% 3.5 FCM	0.11	0.65
			DMI	0.11	0.63
			MFY	0.19	0.42
			MPY	-0.03	0.91
			FE	0.21	0.38
			BCS	0.12	0.61
		Simpson	MY	0.04	0.86
			MF	-0.36	0.12
			MP	0.06	0.8
			ML	-0.08	0.74
			ECM	-0.03	0.9
			% 3.5 FCM	-0.03	0.91
			DMI	0	0.98
			MFY	-0.09	0.71
			MPY	0.06	0.81
			FE	-0.15	0.53
			BCS	-0.08	0.72
	Phylum	Chao1	MY	0.11	0.64
			MF	-0.35	0.13
			MP	-0.19	0.43
			ML	-0.08	0.72
			ECM	0.1	0.68
			% 3.5 FCM	0.1	0.68
			DMI	0.13	0.59
			MFY	0.06	0.79
			MPY	0.19	0.43
			FE	0.03	0.89
			BCS	0.27	0.24
		ACE	MY	0.04	0.87
			MF	-0.34	0.14
			MP	-0.11	0.64
			ML	0	0.99
			ECM	0.04	0.88
			% 3.5 FCM	0.02	0.93
			DMI	0.07	0.77
			MFY	0	0.99
			MPY	0.13	0.58
			FE	-0.03	0.91
			BCS	0.25	0.3
		Shannon	MY	-0.09	0.7
			MF	-0.28	0.23
			MP	-0.13	0.59
			ML	-0.2	0.41
			ECM	-0.17	0.48
			% 3.5 FCM	-0.15	0.53
			DMI	0.13	0.59
			MFY	-0.2	0.41
			MPY	-0.12	0.6
			FE	-0.24	0.3
			BCS	0.21	0.38
		Simpson	MY	0.04	0.86
			MF	0.19	0.42
			MP	0.05	0.82
			ML	0.11	0.65
			ECM	0.09	0.7
			% 3.5 FCM	0.08	0.73
			DMI	-0.22	0.36
			MFY	0.13	0.59
			MPY	0.07	0.76
			FE	0.23	0.33
			BCS	-0.09	0.69
	Family	chao	MY	0.05	0.82
			MF	-0.24	0.3
			MP	-0.19	0.42
			ML	-0.04	0.88
			ECM	0.06	0.79
			% 3.5 FCM	0.05	0.84
			DMI	-0.12	0.61
			MFY	0.08	0.72
			MPY	0.15	0.53
			FE	0.11	0.63
			BCS	0.19	0.43
		ACE	MY	0.05	0.84
			MF	-0.23	0.32
			MP	-0.21	0.38
			ML	-0.05	0.83
			ECM	0.06	0.82
			% 3.5 FCM	0.04	0.85
			DMI	-0.12	0.63
			MFY	0.08	0.74
			MPY	0.14	0.56
			FE	0.1	0.66
			BCS	0.2	0.39
		Shannon	MY	-0.18	0.46
			MF	-0.18	0.46
			MP	-0.32	0.17
			ML	-0.27	0.25
			ECM	-0.21	0.36
			% 3.5 FCM	-0.2	0.4
			DMI	-0.13	0.59
			MFY	-0.18	0.45
			MPY	-0.22	0.36
			FE	-0.11	0.64
			BCS	0.28	0.24
		Simpson	MY	0.22	0.34
			MF	0.13	0.59
			MP	0.36	0.12
			ML	0.34	0.14
			ECM	0.27	0.26
			% 3.5 FCM	0.25	0.28
			DMI	0.14	0.55
			MFY	0.23	0.33
			MPY	0.3	0.2
			FE	0.2	0.4
			BCS	-0.22	0.36
	Genus	Chao1	MY	-0.13	0.59
			MF	-0.58	0.01
			MP	-0.12	0.61
			ML	-0.06	0.81
			ECM	-0.11	0.65
			% 3.5 FCM	-0.13	0.58
			DMI	-0.53	0.02
			MFY	-0.11	0.65
			MPY	0	0.99
			FE	0.07	0.78
			BCS	0.16	0.51
		ACE	MY	-0.12	0.62
			MF	-0.58	0.01
			MP	-0.13	0.58
			ML	-0.07	0.78
			ECM	-0.1	0.67
			% 3.5 FCM	-0.12	0.61
			DMI	-0.52	0.02
			MFY	-0.1	0.68
			MPY	0.01	0.97
			FE	0.07	0.77
			BCS	0.16	0.49
		Shannon	MY	-0.13	0.59
			MF	-0.55	0.01
			MP	0.01	0.98
			ML	-0.08	0.74
			ECM	-0.22	0.35
			% 3.5 FCM	-0.23	0.33
			DMI	-0.39	0.09
			MFY	-0.23	0.32
			MPY	-0.05	0.82
			FE	-0.15	0.53
			BCS	-0.01	0.96
		Simpson	MY	0.14	0.57
			MF	0.44	0.05
			MP	0.2	0.4
			ML	0.24	0.3
			ECM	0.22	0.36
			% 3.5 FCM	0.22	0.35
			DMI	0.29	0.22
			MFY	0.22	0.34
			MPY	0.13	0.58
			FE	0.2	0.41
			BCS	-0.07	0.77
	Species	chao	MY	-0.09	0.69
			MF	-0.51	0.02
			MP	-0.26	0.27
			ML	-0.17	0.48
			ECM	-0.11	0.66
			% 3.5 FCM	-0.12	0.6
			DMI	-0.44	0.05
			MFY	-0.08	0.73
			MPY	-0.02	0.94
			FE	0.11	0.66
			BCS	0.43	0.06
		ACE	MY	-0.09	0.71
			MF	-0.52	0.02
			MP	-0.26	0.26
			ML	-0.17	0.47
			ECM	-0.1	0.68
			% 3.5 FCM	-0.11	0.63
			DMI	-0.43	0.06
			MFY	-0.08	0.75
			MPY	-0.01	0.96
			FE	0.11	0.65
			BCS	0.4	0.08
		Shannon	MY	0.08	0.72
			MF	0.06	0.81
			MP	-0.18	0.45
			ML	0.03	0.91
			ECM	0.07	0.76
			% 3.5 FCM	0.07	0.76
			DMI	-0.05	0.82
			MFY	0.12	0.6
			MPY	0.09	0.7
			FE	0.25	0.29
			BCS	0.15	0.52
		Simpson	MY	0.12	0.62
			MF	-0.11	0.64
			MP	0.23	0.33
			ML	0.06	0.8
			ECM	0.09	0.72
			% 3.5 FCM	0.1	0.68
			DMI	0.03	0.89
			MFY	0.07	0.77
			MPY	0.16	0.49
			FE	0.03	0.91
			BCS	-0.11	0.64
P-values were calculated based on Spearman's rank correlation using a t-test.

## Sheet: Table S4 
Table S4. Significantly different rumen bacteria between LH and LL Groups.
Taxa		LH-Mean %	LH-SD %	LL-Mean %	LL-SD %	P-value
Phylum	p__Bacteroidota	44.8183	6.2429	53.0303	12.6029	0.04515
	p__Fibrobacterota	0.0439	0.0539	0.198293	0.162584	0.04435
	p__Verrucomicrobiota	0.00177	0.00383	0.0174	0.0169	0.0181
Family	f__Lachnospiraceae	21.48	3.613	14.61	5.414	0.007285
	f__norank_o__Clostridia_UCG-014	3.414	1.291	2.048	0.9173	0.007285
	f__F082	1.349	1.464	2.22	0.9796	0.01402
	f__Bacteroidales_RF16_group	0.5772	0.5237	1.17	0.5773	0.01726
	f__Atopobiaceae	0.6537	0.5504	0.1891	0.1486	0.002827
	f__p-251-o5	0.1353	0.2606	0.3474	0.3012	0.01011
	f__Veillonellaceae	0.4015	0.4333	0.03541	0.06603	0.001918
	f__Desulfovibrionaceae	0.2135	0.05935	0.1448	0.05443	0.02329
	f__Fibrobacteraceae	0.04391	0.05391	0.1983	0.1626	0.04435
	f__Bacteroidales_UCG-001	0.02727	0.02283	0.06905	0.02713	0.005667
	f__norank_o__Clostridia_vadinBB60_group	0.02266	0.01504	0.07365	0.05346	0.004495
	f__Lactobacillaceae	0.05276	0.04254	0.01133	0.01053	0.001344
	f__norank_o__WCHB1-41	0.00177	0.003825	0.01735	0.0169	0.0181
	f__Moraxellaceae	0.01664	0.0251	0	0	0.01493
	f__Peptococcaceae	0.008852	0.009625	0	0	0.002155
	f__Anaerofustaceae	0.003541	0.005782	0	0	0.03484
Genus	g__unclassified_f__Lachnospiraceae	5.16094	7.2973	3.53422	1.44783	0.00526834
	g__norank_f__norank_o__Clostridia_UCG-014	3.414	1.291	2.048	0.9173	0.007285
	g__Prevotellaceae_UCG-001	1.734	0.9175	2.624	1.144	0.04515
	g__norank_f__F082	1.349	1.464	2.22	0.9796	0.01402
	g__Eubacterium_ruminantium_group	1.634	0.3119	0.983	0.4735	0.005795
	g__norank_f__Bacteroidales_RF16_group	0.5772	0.5237	1.17	0.5773	0.01726
	g__Shuttleworthia	1.317	0.8696	0.3552	0.2707	0.005142
	g__Syntrophococcus	1.288	0.7724	0.2418	0.251	0.001004
	g__Eubacterium_nodatum_group	0.5676	0.1966	0.3973	0.2261	0.0411
	g__Olsenella	0.6161	0.5306	0.1678	0.1464	0.002202
	g__Lachnospira	0.4125	0.1925	0.1236	0.1014	0.001142
	g__UCG-002	0.1572	0.1942	0.2918	0.1948	0.02819
	g__Moryella	0.1342	0.07159	0.3141	0.1561	0.02324
	g__norank_f__Selenomonadaceae	0.295	0.253	0.09136	0.1291	0.02558
	g__Dialister	0.3332	0.4081	0.02443	0.04185	0.003323
	g__Desulfovibrio	0.2114	0.05734	0.1292	0.05404	0.008127
	g__Erysipelotrichaceae_UCG-002	0.3148	0.4408	0.02195	0.03201	0.009856
	g__UCG-004	0.1073	0.07145	0.2245	0.123	0.04117
	g__Anaerovibrio	0.09985	0.1455	0.2202	0.1813	0.04095
	g__Succinivibrionaceae_UCG-002	0.0007082	0.002239	0.3088	0.8936	0.01875
	g__Roseburia	0.2394	0.1315	0.0694	0.07534	0.00351
	g__CAG-352	0.01948	0.02533	0.2426	0.2996	0.00125
	g__Prevotellaceae_Ga6A1_group	0.04922	0.0612	0.2089	0.1948	0.04467
	g__Fibrobacter	0.04391	0.05391	0.1983	0.1626	0.04435
	g__Veillonellaceae_UCG-001	0.04249	0.07569	0.1377	0.2068	0.01313
	g__Acidaminococcus	0.108	0.07543	0.02939	0.02666	0.007153
	g__Erysipelotrichaceae_UCG-007	0.1268	0.1141	0.007436	0.01588	0.001979
	g__Paraprevotella	0.03081	0.02024	0.102	0.05323	0.003573
	g__norank_f__Bacteroidales_UCG-001	0.02727	0.02283	0.06905	0.02713	0.005667
	g__norank_f__norank_o__Clostridia_vadinBB60_group	0.02266	0.01504	0.07365	0.05346	0.004495
	g__Lachnospiraceae_NC2004_group	0.07967	0.07622	0.01239	0.01784	0.008493
	g__Lachnoclostridium	0.02054	0.03668	0.04603	0.03136	0.03182
	g__Lactobacillus	0.05276	0.04254	0.01133	0.01053	0.001344
	g__Megasphaera	0.04816	0.04867	0.008498	0.01799	0.002943
	g__norank_f__UCG-011	0.002125	0.003806	0.05099	0.05871	0.00552
	g__Eubacterium_eligens_group	0.03081	0.05159	0.002479	0.005292	0.04049
	g__Erysipelotrichaceae_UCG-006	0.02231	0.0264	0.001416	0.004479	0.02097
	g__Allisonella	0.01948	0.01399	0.002479	0.007838	0.005529
	g__Enterorhabdus	0.003895	0.004852	0.017	0.01463	0.03982
	g__norank_f__norank_o__WCHB1-41	0.00177	0.003825	0.01735	0.0169	0.0181
	g__Moraxella	0.01169	0.02265	0	0	0.03498
	g__norank_f__Peptococcaceae	0.006728	0.008746	0	0	0.0148
	g__Anaerofustis	0.003541	0.005782	0	0	0.03484
SD, standard deviation. P-Values between LH and LL were calculated using t-test.
	0.0381387

## Sheet: Table S5 
Table S5. Significantly different rectum bacteria between LH and LL Groups.
Taxa		LH-Mean %	LH-SD %	LL-Mean %	LL-SD %	P-value
Family	f__Christensenellaceae	2.584	0.6889	3.539	0.6379	0.007285
	f__Tannerellaceae	0.1462	0.04632	0.09277	0.02994	0.005059
	f__Desulfovibrionaceae	0.02585	0.02058	0.00602	0.01043	0.02886
	f__Flavobacteriaceae	0.02337	0.01513	0.00779	0.008958	0.01965
	f__Clostridium_methylpentosum_group	0.00177	0.005599	0.01523	0.01844	0.02364
Genus	g__Christensenellaceae_R-7_group	2.5781	0.6898	3.529	0.6349	0.007285
	g__Lachnospiraceae_NK3A20_group	0.4621	0.3272	0.7372	0.4202	0.0489
	g__Eubacterium_oxidoreducens_group	0.5216	0.1886	0.3297	0.1735	0.0492
	g__norank__f __Paludibacteraceae	0.1814	0.0347	0.1314	0.0554	0.0289
	g__Parabacteroides	0.1462	0.04632	0.09277	0.02994	0.005059
	g__Lachnospiraceae_NK4A136_group	0.1023	0.09039	0.02195	0.03925	0.01398
	g__Anaerovorax	0.0538	0.0031	0.0478	0.0066	0.0164
	g__Moryella	0.02443	0.01778	0.04745	0.01941	0.01848
	g__norank_f__Bifidobacteriaceae	0.0177	0.01669	0.05134	0.04079	0.03585
	g__norank_f__Flavobacteriaceae	0.02337	0.01513	0.00779	0.008958	0.01965
	g__Mailhella	0.02372	0.01961	0.004957	0.01045	0.02263
	g__Erysipelotrichaceae_UCG-007	0.02514	0.03328	0.0007082	0.002239	0.01467
	g__Breznakia	0.01098	0.0145	0.002833	0.008958	0.02093
	g__norank_f__Clostridium_methylpentosum_group	0.00177	0.005599	0.01523	0.01844	0.02364
SD, standard deviation. P-Values between LH and LL were calculated using t-test.

## Sheet: Table S6
Table S6. Comparison of SCFAs between LH and LL cows.
					Group
Region	Indicators				LH (n = 10)	LL (n = 10)	SEM	P-value
Rumen	Total SCFA (mmol/L)				154.09	153.29	5.02	0.88
	Ac (mmol/L)				71.08	72.02	2.48	0.44
	Pr (mmol/L)				41.84	35.15	2.43	0.01
	iBu (mmol/L)				6.26	6.52	0.42	0.55
	Bu (mmol/L)				20.12	21.97	1.14	0.12
	iVal (mmol/L)				6.54	6.33	0.53	0.7
	Val (mmol/L)				8.16	8.27	0.78	0.89
	4MVal (mmol/L)				0.03404	0.03	0.006	0.67
	Hex (mmol/L)				1.85	3.03	0.42	0.02
Rectum	Total SCFA (mmol/L)				8.064	7.511	0.62	0.39
	Ac (mmol/L)				5.328	5.02	0.43	0.49
	Pr (mmol/L)				1.6029	1.521	0.15	0.6
	iBu (mmol/L)				0.0716787	0.09	0.01	0.083
	Bu (mmol/L)				1.07178	0.81	0.12	0.02
	iVal (mmol/L)				0.0470625	0.0621736	0.0092	0.124
	Val (mmol/L)				0.1724	0.19	0.02	0.492
	4MVal (mmol/L)				0.00311415	0.03	0.03	0.371
	Hex (mmol/L)				0.00413725	0.008	0.004	0.364
SEM, stand error of the mean. P-Values between LH and LL were calculated using t-test.

## Sheet: Table S7  
Table S7. Network metrics of rumen bacteria composition in the LH and LL group.
Group	Leiden Cluster	Name	Average Shortest Path Length	Betweenness Centrality	Closeness Centrality	Clustering Coefficient	Degree	Eccentricity	Neighborhood Connectivity	Number of Undirected Edges	Radiality	Stress Centrality	Topological Coefficient
LH	1	g__Succiniclasticum	5.98889	0	0.166976	0	1	8	2	1	0.86142	0	0
LH	1	g__Lachnospiraceae_NK4A136_group	5	0.0222222	0.2	0	2	7	1.5	2	0.888889	884	0.5
LH	1	g__norank_f__p-2534-18B5_gut_group	3.26667	0	0.306122	1	2	5	7.5	2	0.937037	0	0.625
LH	1	g__Treponema	3.44444	0	0.290323	0	1	6	9	1	0.932099	0	0
LH	1	g__Ruminococcus	3.23333	0.00828093	0.309278	0	2	5	6.5	2	0.937963	258	0.5
LH	1	g__Anaerovorax	2.93333	0.0241981	0.340909	0.333333	4	5	8	4	0.946296	698	0.322917
LH	1	g__DNF00809	2.21111	0.0298411	0.452261	0.507353	17	6	17.2353	17	0.966358	1862	0.286275
LH	1	g__norank_f__Paludibacteraceae	2.45556	0.0484412	0.40724	0.388889	9	5	13.3333	9	0.959568	2762	0.29798
LH	1	g__Moryella	3.08889	0.0713879	0.323741	0	4	5	4.25	4	0.941975	2840	0.25
LH	1	g__Defluviitaleaceae_UCG-011	4.03333	0.0439451	0.247934	0	2	6	3	2	0.915741	1764	0.5
LH	1	g__Prevotellaceae_UCG-001	1.98889	0.0476449	0.502793	0.426667	25	6	20.56	25	0.972531	3898	0.285556
LH	1	g__Pseudoscardovia	2.35556	0.051222	0.424528	0.290909	11	5	12.0909	11	0.962346	3122	0.232517
LH	1	g__unclassified_f__Ruminococcaceae	3.23333	0.000902	0.309278	0.333333	3	6	6.33333	3	0.937963	34	0.461538
LH	1	g__norank_f__Oscillospiraceae	3.2	0.000674	0.3125	0	2	6	9	2	0.938889	38	0.533333
LH	1	g__unclassified_f__Prevotellaceae	2.62222	0.00850889	0.381356	0.4	6	6	11.3333	6	0.954938	420	0.310185
LH	1	g__Prevotellaceae_NK3B31_group	2.47778	0.00154855	0.403587	0.666667	7	6	19.4286	7	0.958951	146	0.388571
LH	1	g__U29-B03	2.24444	0.0528267	0.445545	0.485714	15	5	15.8667	15	0.965432	3238	0.277193
LH	1	g__Prevotellaceae_YAB2003_group	2.75556	0.0124743	0.362903	0.533333	6	6	13.6667	6	0.951235	410	0.421875
LH	1	g__unclassified_c__Clostridia	2.1	0.0294259	0.47619	0.466667	15	6	22.2667	15	0.969444	2446	0.309259
LH	2	g__Eubacterium_cellulosolvens_group	2.46667	0.0085067	0.405405	0.454545	11	6	19.6364	11	0.959259	586	0.383244
LH	2	g__Lachnospiraceae_AC2044_group	2.55556	0.00446374	0.391304	0.4	5	7	16.8	5	0.95679	272	0.36087
LH	2	g__unclassified_k__norank_d__Bacteria	2.53333	0.00919149	0.394737	0.466667	10	6	15.6	10	0.957407	624	0.318367
LH	2	g__Lactobacillus	2.63333	0.0103932	0.379747	0.466667	6	5	9.83333	6	0.95463	396	0.292929
LH	2	g__UCG-002	2.65556	0.00397318	0.376569	0.4	6	5	15.6667	6	0.954012	330	0.391667
LH	2	g__unclassified_o__Oscillospirales	2.56667	0.0618622	0.38961	0.388889	9	5	12	9	0.956481	3082	0.289973
LH	2	g__Olsenella	2.51111	0.0137022	0.39823	0.436364	11	5	13.7273	11	0.958025	940	0.298419
LH	2	g__FD2005	2.26667	0.0202296	0.441176	0.669118	17	5	25.0588	17	0.964815	1532	0.424726
LH	2	g__norank_f__UCG-010	1.97778	0.0505025	0.505618	0.53202	29	5	23.4138	29	0.97284	5146	0.33933
LH	2	g__unclassified_o__Bacteroidales	2.77778	0.00502595	0.36	0.533333	6	5	9.16667	6	0.950617	284	0.321429
LH	2	g__UCG-005	2.5	0.00624082	0.4	0.464286	8	5	14.375	8	0.958333	416	0.319444
LH	3	g__norank_f__Selenomonadaceae	2.27778	0.00982679	0.439024	0.536765	17	7	20.9412	17	0.964506	870	0.354935
LH	3	g__unclassified_p__Firmicutes	2.35556	0.00470647	0.424528	0.609524	15	7	20.5333	15	0.962346	484	0.366667
LH	3	g__Alloprevotella	2.46667	0.0112328	0.405405	0.690909	11	6	18.9091	11	0.959259	720	0.392045
LH	3	g__norank_f__Prevotellaceae	2.25556	0.00793447	0.44335	0.669118	17	6	19.7647	17	0.965123	1194	0.346749
LH	3	g__Succinivibrionaceae_UCG-001	2.11111	0.0467559	0.473684	0.463158	20	6	17.45	20	0.969136	3476	0.264394
LH	3	g__Oribacterium	2.15556	0.0210597	0.463918	0.563158	20	6	20.55	20	0.967901	2464	0.32619
LH	3	g__norank_f__norank_o__Clostridia_UCG-014	2.25556	0.0100106	0.44335	0.614035	19	7	22.9474	19	0.965123	2496	0.388938
LH	3	g__Prevotellaceae_UCG-003	2.25556	0.00651937	0.44335	0.7	16	6	20.0625	16	0.965123	666	0.345905
LH	3	g__Acetitomaculum	2.06667	0.0126592	0.483871	0.606667	25	6	25.36	25	0.97037	1654	0.390154
LH	3	g__Eubacterium_nodatum_group	2.76667	0.0215393	0.361446	0.571429	8	7	16.375	8	0.950926	5026	0.439189
LH	3	g__Ruminococcus_gauvreauii_group	2.54444	0.00164569	0.393013	0.733333	10	7	19.7	10	0.957099	526	0.410417
LH	3	g__Candidatus_Saccharimonas	2.02222	0.018143	0.494505	0.578462	26	6	23.7692	26	0.971605	2668	0.349548
LH	3	g__Howardella	2.02222	0.0343545	0.494505	0.504926	29	6	21.5862	29	0.971605	5466	0.327064
LH	3	g__Mogibacterium	1.86667	0.0555298	0.535714	0.467803	33	6	22.8485	33	0.975926	6334	0.304646
LH	3	g__unclassified_f__Selenomonadaceae	2.2	0.0157714	0.454545	0.549784	22	7	20.7273	22	0.966667	2570	0.339791
LH	3	g__Selenomonas	2.24444	0.00967796	0.445545	0.584211	20	7	20.3	20	0.965432	1754	0.344068
LH	3	g__norank_f__Eubacterium_coprostanoligenes_group	1.96667	0.0290165	0.508475	0.537634	31	6	24.5161	31	0.973148	5342	0.360531
LH	4	g__Prevotellaceae_UCG-004	3.71111	0.0004	0.269461	0	2	8	5.5	2	0.924691	38	0.5625
LH	4	g__Anaeroplasma	2.91111	0.0132257	0.343511	0.333333	4	7	10.25	4	0.946914	902	0.322581
LH	4	g__Desulfovibrio	3.46667	0.0014199	0.288462	0.333333	3	8	5	3	0.931481	504	0.466667
LH	4	g__norank_f__Bacteroidales_RF16_group	3.33333	0.00113935	0.3	0	2	7	5	2	0.935185	62	0.5
LH	4	g__Monoglobus	2.53333	0.023856	0.394737	0.472222	9	7	18.7778	9	0.957407	3314	0.375556
LH	4	g__Eubacterium_hallii_group	2.03333	0.0451315	0.491803	0.586895	27	6	25.1481	27	0.971296	5542	0.369826
LH	6	g__Lachnospiraceae_UCG-004	2.64444	0.00771764	0.378151	0.2	5	7	12.2	5	0.954321	458	0.287805
LH	5	g__norank_f__Muribaculaceae	2.43333	0.00148756	0.410959	0.695238	15	6	24.0667	15	0.960185	146	0.471895
LH	5	g__norank_f__F082	2.47778	0.00323791	0.403587	0.628205	13	7	22.4615	13	0.958951	450	0.415954
LH	5	g__probable_genus_10	2.44444	0.00300043	0.409091	0.551282	13	7	21.8462	13	0.959877	404	0.397203
LH	5	g__norank_f__norank_o__Absconditabacteriales_SR1	2.38889	0.00331936	0.418605	0.571429	14	7	23.2143	14	0.96142	452	0.414541
LH	5	g__Eubacterium_xylanophilum_group	2.47778	0.00274459	0.403587	0.6	10	7	21.8	10	0.958951	412	0.396364
LH	5	g__Lachnospiraceae_XPB1014_group	1.92222	0.0269145	0.520231	0.524064	34	6	23.8824	34	0.974383	3746	0.346121
LH	5	g__Saccharofermentans	2.17778	0.00971038	0.459184	0.575163	18	6	25.1111	18	0.967284	1220	0.398589
LH	5	g__Rikenellaceae_RC9_gut_group	1.87778	0.0392091	0.532544	0.5	36	6	22.8889	36	0.975617	5056	0.317901
LH	5	g__UCG-001	2.12222	0.0185849	0.471204	0.567816	30	6	23.5667	30	0.968827	2580	0.374074
LH	6	g__Sharpea	3.17778	0	0.314685	1	6	7	14.1667	6	0.939506	0	0.590278
LH	6	g__Lachnospiraceae_NK3A20_group	2.66667	0.0114793	0.375869	0.571429	7	7	12.5714	7	0.953704	836	0.314286
LH	6	g__norank_f__norank_o__Gastranaerophilales	2.71111	0.010381	0.368852	0.333333	6	6	9.33333	6	0.952469	444	0.27451
LH	6	g__unclassified_f__Lachnospiraceae	2.83333	0.00870797	0.352941	0.6	10	7	11.6	10	0.949074	580	0.4
LH	6	g__Eubacterium_ruminantium_group	2.83333	0.00125372	0.352941	0.805556	9	7	14.6667	9	0.949074	250	0.431373
LH	6	g__Erysipelotrichaceae_UCG-002	2.55556	0.0116989	0.391304	0.56044	14	7	16.4286	14	0.95679	2048	0.349544
LH	6	g__Acidaminococcus	2.18889	0.0217422	0.456853	0.56	25	6	23.4	25	0.966975	3624	0.377419
LH	6	g__Eubacterium_ventriosum_group	2.46667	0.0045017	0.405405	0.571429	15	7	20.7333	15	0.959259	526	0.391195
LH	6	g__norank_f__Lachnospiraceae	2.55556	0.00286898	0.391304	0.621212	12	7	20	12	0.95679	266	0.4
LH	6	g__unclassified_f__Erysipelotrichaceae	2.67778	0.00378006	0.373444	0.666667	12	7	15.0833	12	0.953395	690	0.377083
LH	6	g__Roseburia	2.34444	0.016329	0.42654	0.595588	17	7	20.2941	17	0.962654	1954	0.356037
LH	6	g__Syntrophococcus	2.25556	0.0240666	0.44335	0.526154	26	6	21.9231	26	0.965123	3226	0.384615
LH	6	g__Pseudoramibacter	2.38889	0.0189147	0.418605	0.532164	19	6	19.6316	19	0.96142	3992	0.363548
LH	6	g__Erysipelotrichaceae_UCG-007	2.36667	0.0216565	0.422535	0.519048	21	6	19.4286	21	0.962037	4352	0.359788
LH	7	g__Prevotella	2.1	0.00312358	0.47619	0.778986	24	6	27.0417	24	0.969444	668	0.409722
LH	7	g__Blautia	2.2	0.0189944	0.454545	0.685714	21	5	25	21	0.966667	1344	0.416667
LH	7	g__Shuttleworthia	1.98889	0.0214	0.508793	0.605911	29	6	25.2069	29	0.972531	4170	0.365317
LH	7	g__Family_XIII_AD3011_group	2.04444	0.00709247	0.48913	0.709402	27	6	27.1852	27	0.970988	1998	0.405749
LH	7	g__norank_f__Ruminococcaceae	2.1	0.00654288	0.47619	0.718615	22	6	26.6364	22	0.969444	1008	0.403581
LH	7	g__Marvinbryantia	2	0.00622115	0.500006	0.744615	26	6	27.6538	26	0.972222	1544	0.395055
LH	7	g__Lachnospira	1.96667	0.0577225	0.508475	0.516667	25	6	24.2	25	0.973148	5368	0.330959
LH	7	g__Christensenellaceae_R-7_group	1.96667	0.0120118	0.508475	0.593548	31	6	24.7097	31	0.973148	4512	0.358111
LH	7	g__unclassified_f__Anaerovoracaceae	1.98889	0.0156997	0.502793	0.605911	29	6	25.6207	29	0.972531	2890	0.376775
LH	7	g__Anaerovibrio	2.1	0.00836867	0.47619	0.653333	25	6	24.76	25	0.969444	1336	0.375152
LH	7	g__NK4A214_group	2.01111	0.0174111	0.497238	0.640394	29	6	25.7241	29	0.971914	3644	0.372814
LH	7	g__Pseudobutyrivibrio	1.91111	0.0192314	0.523256	0.531194	34	6	24.4118	34	0.974691	4674	0.348739
LH	7	g__Butyrivibrio	2.03333	0.00948071	0.491803	0.677249	28	6	26.5714	28	0.971296	1914	0.396588
LH	7	g__Colidextribacter	2.05556	0.00875825	0.486486	0.678063	27	6	26.5185	27	0.970679	1764	0.401796
LL	1	g__NK4A214_group	2.07071	0.0262648	0.482927	0.552688	31	4	23.2903	31	0.969408	3260	0.347617
LL	1	g__UCG-004	2.12121	0.00949396	0.471429	0.618462	26	4	24.4231	26	0.967965	1464	0.37574
LL	1	g__Sharpea	2.78788	0.000572867	0.358696	0.6	5	5	17.2	5	0.948918	84	0.419512
LL	1	g__Candidatus_Saccharimonas	2.81818	0.000690447	0.354839	0.642857	8	5	15.75	8	0.948052	50	0.414474
LL	1	g__Acetitomaculum	1.90909	0.0288057	0.52381	0.551136	33	4	23.8485	33	0.974026	3566	0.313796
LL	1	g__norank_f__UCG-010	2.33333	0.00927531	0.428571	0.625	16	4	22.125	16	0.961905	1064	0.375
LL	1	g__Family_XIII_AD3011_group	2.23232	0.0221347	0.447964	0.544118	17	4	22	17	0.964791	1852	0.34375
LL	1	g__norank_f__norank_o__RF39	2.17172	0.0184555	0.460465	0.554348	24	4	22.9583	24	0.966522	2298	0.358724
LL	1	g__unclassified_c__Clostridia	2.45455	0.00820363	0.407407	0.651515	12	4	22.4167	12	0.958442	586	0.41358
LL	1	g__norank_f__norank_o__Clostridia_UCG-014	2.15152	0.0219532	0.464789	0.523333	25	4	22.08	25	0.9671	2434	0.350476
LL	1	g__norank_f__norank_o__Bacteroidales	1.92929	0.0410027	0.518325	0.563492	28	3	24.1429	28	0.973449	4392	0.309524
LL	1	g__Lachnospiraceae_UCG-004	2.64646	0.00120595	0.377863	0.714286	7	4	18.5714	7	0.952958	152	0.442177
LL	1	g__Ruminococcus_gauvreauii_group	2.0404	0.0181925	0.490099	0.561254	27	4	23.4444	27	0.970274	2072	0.334921
LL	1	g__norank_f__Ruminococcaceae	2.62626	0.002835	0.380769	0.581818	11	5	18	11	0.953535	286	0.409091
LL	1	g__norank_f__F082	2.50505	0.00067043	0.399194	0.787879	12	5	24.8333	12	0.956999	102	0.459877
LL	1	g__unclassified_f__Oscillospiraceae	2.75758	0.00449636	0.362637	0.4	6	5	14	6	0.949784	230	0.329365
LL	1	g__Anaerovorax	2.61616	0.00141902	0.382239	0.571429	7	5	18.5714	7	0.953824	186	0.386905
LL	2	g__Prevotella	1.92929	0.0245584	0.518325	0.531092	35	4	23.4571	35	0.973449	3296	0.316988
LL	2	g__Anaeroplasma	2.27273	0.016085	0.44	0.492647	17	4	19.9412	17	0.963636	1408	0.326905
LL	2	g__Moryella	2.58586	0.00590947	0.386719	0.527778	9	5	17.1111	9	0.95469	382	0.364066
LL	2	g__Rikenellaceae_RC9_gut_group	2.20202	0.0313421	0.454128	0.471861	22	4	21.2727	22	0.965657	2452	0.326573
LL	2	g__Prevotellaceae_UCG-004	2.0202	0.0183778	0.495	0.576344	31	4	24.0645	31	0.970851	2534	0.348761
LL	2	g__Butyrivibrio	2.36364	0.0026157	0.423077	0.648352	14	4	22.7857	14	0.961039	360	0.406888
LL	2	g__Defluviitaleaceae_UCG-011	2.46465	0.00637979	0.405738	0.571429	8	4	20.5	8	0.958153	418	0.386792
LL	2	g__norank_f__norank_o__Clostridia_vadinBB60_group	3	0.000487751	0.333333	0.6	5	5	10	5	0.942857	40	0.384615
LL	2	g__Treponema	2.18182	0.0338922	0.458333	0.508772	19	4	21.6842	19	0.966234	2704	0.333603
LL	2	g__norank_f__Bacteroidales_RF16_group	2.25253	0.0179601	0.443946	0.428571	15	4	19.6	15	0.964214	1488	0.321311
LL	2	g__Ruminococcus	2.94949	0.000780999	0.339041	0.6	5	5	13.2	5	0.9443	54	0.4
LL	2	g__Colidextribacter	2.57576	0.00648902	0.388235	0.472727	11	5	16.7273	11	0.954978	558	0.327986
LL	3	g__norank_f__Eubacterium_coprostanoligenes_group	1.88889	0.024623	0.529412	0.564039	29	3	24.4483	29	0.974603	3558	0.301831
LL	3	g__Desulfovibrio	2.0303	0.0611194	0.492537	0.394737	20	3	18.8	20	0.970563	5588	0.247368
LL	3	g__Syntrophococcus	2.33333	0.0207817	0.428571	0.381818	11	3	12.2727	11	0.961905	1524	0.22314
LL	3	g__Eubacterium_nodatum_group	2.20202	0.0306279	0.454128	0.428571	14	4	19.4286	14	0.965657	2818	0.294372
LL	3	g__Olsenella	2.50505	0.0172869	0.399194	0.535714	8	4	12.625	8	0.956999	1130	0.277778
LL	3	g__Lachnospiraceae_AC2044_group	2.0303	0.03291	0.492537	0.528571	21	3	22.7143	21	0.970563	3278	0.302857
LL	3	g__norank_f__p-251-o5	2.28283	0.0428	0.438053	0.384615	14	4	14.9286	14	0.963348	4302	0.24881
LL	3	g__Paraprevotella	2.65657	0.00437526	0.376426	0.607143	8	4	11	8	0.95267	232	0.305556
LL	3	g__norank_f__Bacteroidales_UCG-001	2.13131	0.0171708	0.469194	0.566667	16	4	23.1875	16	0.967677	1996	0.326585
LL	3	g__norank_f__Muribaculaceae	2.71717	0.00289214	0.36803	0.5	4	4	12.75	4	0.950938	184	0.403226
LL	3	g__Succinivibrionaceae_UCG-002	2.94949	0	0.339041	1	4	4	11	4	0.9443	0	0.478261
LL	4	g__Eubacterium_xylanophilum_group	3.0202	0.00927894	0.331104	0.333333	4	5	7	4	0.94228	670	0.3375
LL	4	g__Lachnospiraceae_NK4A136_group	2.64646	0.0158831	0.377863	0.285714	8	4	9.25	8	0.952958	1258	0.253472
LL	4	g__Coprococcus	3.29293	0.00103442	0.303681	0.666667	3	5	7.66667	3	0.934488	44	0.479167
LL	4	g__norank_f__p-2534-18B5_gut_group	2.44444	0.030675	0.409091	0.236364	11	4	8.36364	11	0.95873	1874	0.170686
LL	4	g__norank_f__norank_o__Gastranaerophilales	2.88889	0.00282557	0.346154	0.4	5	5	8	5	0.946032	124	0.307692
LL	4	g__Lachnospiraceae_XPB1014_group	2.33333	0.017702	0.428571	0.444444	9	4	19.5556	9	0.961905	1098	0.315412
LL	4	g__Alloprevotella	2.60606	0.00572062	0.383721	0.4	5	4	11.2	5	0.954113	306	0.273171
LL	4	g__Pseudobutyrivibrio	2.66667	0.0061497	0.375	0.266667	6	4	10	6	0.952381	376	0.252137
LL	4	g__FD2005	2.64646	0.00296003	0.377863	0.4	5	4	13.2	5	0.952958	272	0.3
LL	4	g__Roseburia	3.38384	0.00455042	0.295522	0	3	5	5	3	0.93189	116	0.333333
LL	4	g__probable_genus_10	2.51515	0.00841493	0.39759	0.321429	8	4	12.25	8	0.95671	650	0.255208
LL	4	g__Prevotellaceae_Ga6A1_group	2.19192	0.0264384	0.456221	0.666667	18	4	25.7222	18	0.965945	1826	0.401042
LL	5	g__unclassified_f__Anaerovoracaceae	1.93939	0.0381387	0.515625	0.501149	30	4	22.6667	30	0.97316	3614	0.294372
LL	5	g__Veillonellaceae_UCG-001	2.88889	0.00400071	0.346154	0.4	6	5	8.16667	6	0.946032	162	0.307692
LL	5	g__Prevotellaceae_NK3B31_group	2.88889	0.00240471	0.346154	0.533333	6	5	9	6	0.946032	128	0.333333
LL	5	g__Anaerovibrio	2.37374	0.061098	0.521277	0.464286	8	4	20.125	8	0.96075	586	0.346983
LL	5	g__Succiniclasticum	2.26263	0.0335123	0.441964	0.4	15	4	17.1333	15	0.963925	3088	0.276344
LL	5	g__Schwartzia	2.31313	0.0165318	0.432314	0.377778	10	4	15.3	10	0.962482	1312	0.25082
LL	5	g__DNF00809	2.31313	0.02585	0.432314	0.466667	10	4	16.3	10	0.962482	1830	0.276271
LL	5	g__unclassified_k__norank_d__Bacteria	2.36364	0.0122588	0.423077	0.321429	8	3	14.25	8	0.961039	734	0.259091
LL	5	g__Succinivibrionaceae_UCG-001	2.42424	0.0196449	0.4125	0.392857	8	4	13.875	8	0.959307	1590	0.266827
LL	5	g__norank_f__Prevotellaceae	2.93939	0.00786403	0.340206	0.333333	6	5	7	6	0.944589	304	0.273333
LL	5	g__Eubacterium_ventriosum_group	3.25253	0.00129121	0.307453	0	2	5	7	2	0.935642	58	0.5
LL	5	g__Bifidobacterium	3.11111	0.0065574	0.321429	0.333333	3	4	7	3	0.939683	474	0.47619
LL	6	g__Saccharofermentans	1.94949	0.0202296	0.502953	0.613793	30	4	25.1667	30	0.972872	3092	0.335556
LL	6	g__unclassified_f__Lachnospiraceae	1.9697	0.0128719	0.507692	0.642857	29	4	25.6207	29	0.972294	2056	0.346226
LL	6	g__Mogibacterium	2.11111	0.0142487	0.473684	0.606667	25	4	24.24	25	0.968254	1484	0.361791
LL	6	g__Marvinbryantia	2.11111	0.00737895	0.473684	0.655385	26	4	25.1154	26	0.968254	1104	0.380536
LL	6	g__Eubacterium_hallii_group	1.94949	0.0259671	0.512953	0.580645	31	4	24.1935	31	0.972872	2680	0.322581
LL	6	g__Lachnospiraceae_NK3A20_group	2.0202	0.00908756	0.495	0.629885	30	4	25	30	0.970851	1542	0.357143
LL	6	g__Christensenellaceae_R-7_group	1.9697	0.0368335	0.507692	0.536946	29	4	23.1724	29	0.972294	3478	0.308966
LL	6	g__Lachnospiraceae_UCG-008	2.0202	0.0297845	0.495	0.576355	29	4	23.931	29	0.970851	2996	0.337057
LL	6	g__Prevotellaceae_YAB2003_group	2.0202	0.0201016	0.495	0.569801	27	4	23.4444	27	0.970851	2124	0.325617
LL	6	g__norank_f__Oscillospiraceae	2.18182	0.00622765	0.458333	0.660819	19	4	24.3684	19	0.966234	688	0.374899
LL	6	g__Blautia	2.20202	0.00559796	0.454128	0.678947	20	4	24.75	20	0.965657	654	0.392857
LL	6	g__Eubacterium_ruminantium_group	2.10101	0.0306751	0.475962	0.52381	22	4	22.6818	22	0.968543	2532	0.319462
LL	6	g__Howardella	2.29293	0.01551	0.436123	0.435897	13	4	18.6154	13	0.963059	1288	0.310256
LL	6	g__norank_f__Lachnospiraceae	2.43434	0.00473719	0.410788	0.781818	11	4	25.3636	11	0.959019	610	0.461157
LL	7	g__unclassified_o__Oscillospirales	2.47475	0.0229846	0.404082	0.285714	8	4	10.875	8	0.957864	1334	0.219388
LL	7	g__UCG-001	2.9798	0.0053673	0.335593	0.5	5	4	7.2	5	0.943434	222	0.342857
LL	7	g__UCG-002	2.88889	0.00422207	0.346154	0.6	5	4	7.2	5	0.946032	218	0.342857
LL	7	g__Lachnospira	2.51515	0.0194618	0.39759	0.357143	8	4	11.375	8	0.95671	1332	0.252778
LL	7	g__Shuttleworthia	2.75758	0.0146196	0.362637	0.357143	8	4	8.25	8	0.949784	922	0.275
LL	7	g__unclassified_p__Firmicutes	2.87879	0.00663375	0.347368	0.47619	7	4	7.85714	7	0.94632	296	0.291005
LL	7	g__Oribacterium	2.82828	0.0144319	0.353571	0.392857	8	4	7	8	0.947763	624	0.245536
LL	7	g__Pseudoscardovia	2.65657	0.0151931	0.376426	0.47619	7	4	9.71429	7	0.95267	1086	0.277551
LL	7	g__norank_f__Selenomonadaceae	2.69697	0.0159473	0.370787	0.388889	9	4	8.44444	9	0.951515	674	0.228228
LL	7	g__unclassified_f__Selenomonadaceae	2.44444	0.0364673	0.409091	0.25	8	4	9.5	8	0.95873	1942	0.19
LL	7	g__UCG-005	2.60606	0.0110754	0.383721	0.333333	7	4	8.42857	7	0.954113	684	0.216117
LL	7	g__U29-B03	2.74747	0.0186961	0.363971	0.277778	9	4	7.33333	9	0.950072	706	0.222222
LL	7	g__Prevotellaceae_UCG-003	2.55556	0.0291254	0.391304	0.244444	10	4	7.2	10	0.955556	1264	0.189474
LL	7	g__unclassified_f__Prevotellaceae	2.47475	0.0238963	0.404082	0.266667	10	4	9	10	0.957864	1134	0.195652
LL	7	g__norank_f__norank_o__Absconditabacteriales_SR1	2.33333	0.0233797	0.428571	0.277778	9	4	11.8889	9	0.961905	1202	0.1949
LL	7	g__CAG-352	2.67677	0.00549057	0.373585	0.2	5	4	9.2	5	0.952092	320	0.266667
LL	7	g__Selenomonas	2.59596	0.0100023	0.385214	0.4	6	4	11.1667	6	0.954401	480	0.25969
LL	7	g__unclassified_o__Bacteroidales	2.92929	0.00796204	0.341379	0.333333	6	4	6.5	6	0.944877	312	0.270833
LL	7	g__unclassified_f__Ruminococcaceae	2.75758	0.00551695	0.362637	0.333333	4	4	9.75	4	0.949784	360	0.296875
LL	7	g__norank_f__norank_o__Bradymonadales	3.52525	0	0.283668	1	2	5	7.5	2	0.92785	0	0.681818
LL	7	g__Prevotellaceae_UCG-001	3.20202	0	0.312303	1	3	5	7.66667	3	0.937085	0	0.547619

## Sheet: Table S8 
Table S8. Network metrics of rectum bacteria composition in the LH and LL group.
Group	Leiden Cluster	Name	Average Shortest Path Length	Betweenness Centrality	Closeness Centrality	Clustering Coefficient	Degree	Eccentricity	Neighborhood Connectivity	Number of Undirected Edges	Radiality	Stress	Topological Coefficient
LH	1	g__Paeniclostridium	2.40449	0.031155	0.415888	0.450549	14	5	11.5	14	0.917383	2500	0.234694
LH	1	g__Romboutsia	2.51685	0.0265974	0.397321	0.472727	11	5	11.0909	11	0.910773	1646	0.27051
LH	1	g__UCG-005	2.4382	0.0692968	0.410138	0.323529	17	5	9.58824	17	0.9154	2784	0.20844
LH	1	g__Turicibacter	2.42697	0.0380623	0.412037	0.423077	13	5	11.0769	13	0.916061	1902	0.235679
LH	1	g__Clostridium_sensu_stricto_1	2.59551	0.0217911	0.385281	0.466667	10	4	10.8	10	0.906147	980	0.276923
LH	1	g__unclassified_f__Peptostreptococcaceae	2.52809	0.011721	0.395556	0.555556	10	5	12.8	10	0.910112	822	0.297674
LH	1	g__Cellulosilyticum	3.02247	0.00213608	0.330855	0.666667	6	5	11.1667	6	0.881031	104	0.429487
LH	1	g__unclassified_c__Bacilli	3.14607	0.00383692	0.317857	0.333333	4	5	7.25	4	0.873761	132	0.3625
LH	1	g__Eubacterium_oxidoreducens_group	2.48315	0.0346263	0.422715	0.5	13	4	11.3077	13	0.912756	1392	0.26297
LH	1	g__Bacteroides	2.78652	0.0182846	0.358871	0.4	6	5	10.3333	6	0.894911	646	0.333333
LH	1	g__Dorea	2.73034	0.0235663	0.366255	0.424242	12	5	10	12	0.898215	962	0.285714
LH	1	g__Eubacterium_nodatum_group	3.07865	0.0103119	0.324818	0.333333	3	5	9.33333	3	0.877726	280	0.36
LH	1	g__Prevotellaceae_UCG-003	3.03371	0.0111898	0.32963	0.2	5	5	6.8	5	0.88037	304	0.264
LH	2	g__Eubacterium_siraeum_group	2.50562	0.0342423	0.399103	0.514286	15	5	12.0667	15	0.911434	1284	0.301667
LH	2	g__norank_f__Eubacterium_coprostanoligenes_group	2.70787	0.00357254	0.369295	0.727273	11	5	13.2727	11	0.899537	298	0.390374
LH	2	g__norank_f__norank_o__Izemoplasmatales	2.67416	0.00533123	0.37395	0.666667	10	5	13.2	10	0.90152	410	0.366667
LH	2	g__Candidatus_Soleaferrea	2.50562	0.0339808	0.399103	0.428571	14	5	11.5714	14	0.911434	1362	0.27381
LH	2	g__unclassified_f__Rikenellaceae	3.02247	0.0148878	0.330855	0.5	8	6	7.75	8	0.881031	838	0.322917
LH	2	g__unclassified_f__Anaerovoracaceae	3.30337	0.0134027	0.302721	0.5	5	5	7.2	5	0.864508	346	0.388889
LH	2	g__Ruminococcus	2.88764	0.0109895	0.346304	0.583333	9	5	11.6667	9	0.888962	516	0.388889
LH	2	g__Frisingicoccus	2.75281	0.029216	0.363265	0.409091	12	6	9.41667	12	0.896894	1336	0.276961
LH	2	g__norank_f__norank_o__Bacteroidales	3.65169	0.00177511	0.273846	0.6	5	6	6	5	0.844019	60	0.5
LH	2	g__Prevotellaceae_UCG-004	2.73034	0.0381642	0.366255	0.285714	7	5	10.4286	7	0.898215	1126	0.298319
LH	2	g__Eubacterium_hallii_group	2.65169	0.0356708	0.377119	0.392857	8	5	10.875	8	0.902842	1838	0.271875
LH	2	g__Bifidobacterium	2.5618	0.0611349	0.390351	0.288889	10	5	10.2	10	0.90813	2838	0.229545
LH	2	g__EMP-G18	2.5618	0.0220152	0.390351	0.488889	10	5	12.3	10	0.90813	860	0.327027
LH	2	g__Anaerovorax	3.14607	0.00978422	0.317857	0.47619	7	5	6.85714	7	0.873761	412	0.298137
LH	2	g__Lachnospiraceae_AC2044_group	3.22472	0.00507117	0.310105	0.6	6	6	8.16667	6	0.869134	314	0.408333
LH	2	g__Alistipes	3.30337	0.00732664	0.302721	0.333333	4	5	5.75	4	0.864508	264	0.366667
LH	2	g__Odoribacter	3.44944	0.00702258	0.289902	0	3	6	4.66667	3	0.855915	156	0.333333
LH	2	g__Anaeroplasma	3.39326	0.00787032	0.294702	0	3	6	5.33333	3	0.85922	290	0.361111
LH	3	g__Anaerorhabdus_furcosa_group	2.77528	0.0200526	0.360324	0.416667	9	5	9.66667	9	0.895572	640	0.292929
LH	3	g__Erysipelatoclostridium	2.91011	0.00879552	0.343629	0.535714	8	5	9.125	8	0.88764	394	0.314655
LH	3	g__Phascolarctobacterium	2.83146	0.00715965	0.353175	0.533333	6	5	11.3333	6	0.892267	328	0.354167
LH	3	g__Lachnospiraceae_UCG-004	2.80899	0.0197216	0.356	0.333333	7	5	8.85714	7	0.893589	670	0.267857
LH	3	g__unclassified_k__norank_d__Bacteria	2.51685	0.0357997	0.397321	0.373626	14	5	10	14	0.910773	1550	0.238095
LH	3	g__norank_f__Bacteroidales_RF16_group	3.08989	0.00183125	0.323636	0.733333	6	5	8.83333	6	0.877065	102	0.368056
LH	3	g__UCG-004	2.7191	0.01286	0.367769	0.466667	10	5	10.6	10	0.898876	658	0.302857
LH	3	g__unclassified_p__Firmicutes	3.25843	0.00123326	0.306897	0.7	5	6	8	5	0.867151	48	0.421053
LH	3	g__unclassified_c__Bacteroidia	2.75281	0.00893732	0.363265	0.333333	4	5	10.5	4	0.896894	322	0.320312
LH	4	g__unclassified_f__Lachnospiraceae	3.19101	0.000279285	0.31338	0.833333	4	6	9.25	4	0.871117	28	0.4625
LH	4	g__Agathobacter	2.67416	0.0381431	0.37395	0.222222	9	5	7.77778	9	0.90152	1244	0.207207
LH	4	g__Prevotellaceae_Ga6A1_group	2.97753	0.017276	0.335849	0.2	5	5	5	5	0.883675	508	0.252632
LH	4	g__norank_f__Oscillospiraceae	2.58427	0.0438501	0.386957	0.333333	12	5	9.25	12	0.906808	1810	0.22561
LH	4	g__Roseburia	3.39326	0	0.294702	1	2	6	10.5	2	0.85922	0	0.7
LH	4	g__Blautia	3.19101	0.000279285	0.31338	0.833333	4	6	9.25	4	0.871117	28	0.4625
LH	4	g__Monoglobus	3.1236	0.00677522	0.320144	0.2	5	6	6.6	5	0.875083	218	0.304762
LH	4	g__Pygmaiobacter	2.79775	0.0260683	0.35743	0.2	6	5	7.66667	6	0.89425	774	0.234375
LH	4	g__Marvinbryantia	3.17978	0.00418382	0.314488	0.333333	3	5	5.33333	3	0.871778	118	0.384615
LH	5	g__norank_f__norank_o__RF39	2.94382	0.0423938	0.339695	0.2	6	5	5.5	6	0.885658	1032	0.217391
LH	5	g__norank_f__norank_o__Clostridia_UCG-014	3.04494	0.0330185	0.328413	0.266667	6	5	4.83333	6	0.879709	888	0.236842
LH	5	g__norank_f__Peptococcaceae	3.30337	0.0294939	0.302721	0.4	5	5	4.4	5	0.864508	882	0.323077
LH	5	g__Defluviitaleaceae_UCG-011	4.29213	0	0.232984	0	1	6	5	1	0.806345	0	0
LH	5	g__norank_f__Barnesiellaceae	2.66292	0.0613834	0.375527	0.333333	7	4	8.71429	7	0.902181	2128	0.256303
LH	5	g__UCG-009	3.37079	0.0254302	0.296667	0	3	5	4.33333	3	0.860542	568	0.333333
LH	5	g__Rikenellaceae_RC9_gut_group	4.35955	0	0.229381	0	1	6	3	1	0.802379	0	0
LH	5	g__Parabacteroides	4.01124	0	0.2493	1	2	6	5.5	2	0.822868	0	0.785714
LH	6	g__Syntrophococcus	2.52809	0.0384377	0.395556	0.288889	10	4	9.8	10	0.910112	1322	0.236585
LH	6	g__norank_f__UCG-010	3	0.00626833	0.333333	0.4	5	5	7	5	0.882353	188	0.318182
LH	6	g__unclassified_f__Prevotellaceae	2.40449	0.0910243	0.415888	0.181818	12	5	9.41667	12	0.917383	3396	0.185
LH	6	g__Alloprevotella	2.79775	0.0155956	0.35743	0.380952	7	4	7.14286	7	0.89425	550	0.246305
LH	6	g__dgA-11_gut_group	2.82022	0.0102653	0.354582	0.333333	4	4	8.25	4	0.892928	344	0.296296
LH	6	g__Lachnospiraceae_NK4A136_group	3.11236	0.0279992	0.3213	0.2	6	5	5.5	6	0.875744	552	0.246032
LH	6	g__Negativibacillus	3.1236	0.0249774	0.320144	0	3	5	6.33333	3	0.875083	788	0.355556
LH	6	g__Fibrobacter	2.75281	0.0431001	0.363265	0.2	6	4	7.33333	6	0.896894	1038	0.223958
LH	6	g__Christensenellaceae_R-7_group	2.8427	0.023024	0.351779	0.285714	7	5	5.85714	7	0.891606	658	0.225275
LH	6	g__unclassified_o__Bacteroidales	2.67416	0.0296451	0.37395	0.2	6	5	7.16667	6	0.90152	840	0.212121
LH	6	g__Oscillibacter	3.10112	0.0165426	0.322464	0.333333	4	5	6	4	0.876404	396	0.338235
LH	6	g__Treponema	2.95506	0.0010312	0.338403	0.833333	4	5	9	4	0.884997	56	0.391304
LH	6	g__norank_f__norank_o__Clostridia_vadinBB60_group	3.14607	0.00156966	0.317857	0.666667	4	5	6.5	4	0.873761	48	0.361111
LH	6	g__Family_XIII_AD3011_group	3.01124	0.0104894	0.33209	0.333333	6	5	6.16667	6	0.881692	300	0.280303
LH	6	g__norank_f__p-251-o5	2.82022	0.0210588	0.354582	0.285714	7	5	6.14286	7	0.892928	606	0.230769
LH	6	g__Anaerovibrio	2.5618	0.0454293	0.390351	0.277778	9	5	9.11111	9	0.90813	1672	0.222222
LH	6	g__Prevotella	2.94382	0.00558904	0.339695	0.4	5	5	8	5	0.885658	206	0.347826
LH	6	g__Lachnospiraceae_NC2004_group	4.11236	0	0.243169	0	1	6	3	1	0.81692	0	0
LH	7	g__unclassified_f__Oscillospiraceae	2.55056	0.0122803	0.39207	0.590909	12	4	12.1667	12	0.90879	622	0.337963
LH	7	g__unclassified_f__Ruminococcaceae	2.46067	0.0318969	0.406393	0.504762	15	4	11.9333	15	0.914078	1342	0.298333
LH	7	g__Eubacterium_ruminantium_group	2.46067	0.0288689	0.406393	0.5	17	4	11.5882	17	0.914078	1352	0.297134
LH	7	g__unclassified_c__Clostridia	2.4382	0.0340124	0.410138	0.549451	14	4	12.7143	14	0.9154	1480	0.29402
LH	7	g__unclassified_f__Hungateiclostridiaceae	2.41573	0.0196049	0.413953	0.566667	16	4	12.75	16	0.916722	1126	0.289773
LH	7	g__Ruminococcus_gauvreauii_group	2.32584	0.0553508	0.429952	0.495238	15	4	13	15	0.922009	2396	0.265306
LH	7	g__Lachnospiraceae_NK3A20_group	2.4382	0.0217679	0.410138	0.576923	13	4	12.8462	13	0.9154	1178	0.298748
LH	7	g__UCG-002	2.29213	0.0480004	0.436275	0.474359	13	4	12.7692	13	0.923992	2044	0.239478
LH	7	g__Coprococcus	2.23596	0.0957561	0.447236	0.304762	15	4	11.8	15	0.927297	4112	0.210714
LH	7	g__Acetitomaculum	2.66292	0.0330271	0.375527	0.461538	13	5	11.2308	13	0.902181	1538	0.330317
LH	7	g__Eubacterium_brachy_group	3.58427	0.00191507	0.278997	0.333333	3	6	6.33333	3	0.847984	94	0.428571
LH	7	g__Olsenella	2.59551	0.0359646	0.385281	0.5	8	5	12	8	0.906147	1158	0.3
LH	7	g__Prevotellaceae_UCG-001	3.07865	0.000101033	0.324818	0.9	5	5	13.8	5	0.877726	10	0.575
LH	7	g__Butyrivibrio	3.29213	0.00139529	0.303754	0.666667	3	5	10.3333	3	0.865169	76	0.516667
LH	7	g__Mogibacterium	2.91011	0.027173	0.343629	0.3	5	5	10.6	5	0.88764	796	0.377778
LL	1	g__norank_f__Peptococcaceae	3.10753	0.00182048	0.321799	0.666667	3	4	7.33333	3	0.924731	112	0.431373
LL	1	g__Lachnospiraceae_UCG-010	2.89247	0.000119008	0.345725	0	2	5	15.5	2	0.932412	14	0.557692
LL	1	g__Eubacterium_siraeum_group	2.78495	0.013157	0.359073	0.4	6	4	7.83333	6	0.936252	604	0.279762
LL	1	g__norank_f__norank_o__Clostridia_UCG-014	2.33333	0.0139732	0.428571	0.357143	8	4	17.75	8	0.952381	856	0.309211
LL	1	g__Prevotellaceae_Ga6A1_group	2.56989	0.00733854	0.389121	0.5	5	4	12.4	5	0.943932	374	0.302439
LL	1	g__unclassified_f__Ruminococcaceae	2.43011	0.0210992	0.411504	0.5	13	4	17.1538	13	0.948925	1536	0.37291
LL	1	g__Blautia	2.22581	0.0201692	0.449275	0.393939	12	4	15.0833	12	0.956221	1198	0.247268
LL	1	g__Defluviitaleaceae_UCG-011	2.31183	0.0320017	0.432558	0.345455	11	4	12.0909	11	0.953149	1614	0.218182
LL	1	g__Butyrivibrio	2.30108	0.0130928	0.434579	0.444444	10	4	14.2	10	0.953533	860	0.253571
LL	1	g__unclassified_f__Lachnospiraceae	2.33333	0.00521104	0.428571	0.535714	8	4	15.75	8	0.952381	374	0.28125
LL	1	g__dgA-11_gut_group	2.15054	0.0286407	0.465	0.515789	20	4	18.4	20	0.958909	1900	0.296774
LL	1	g__unclassified_f__Hungateiclostridiaceae	2.02151	0.0340394	0.494681	0.496667	25	4	19.12	25	0.963518	2468	0.273143
LL	2	g__norank_f__Muribaculaceae	2.69892	0.004027	0.370518	0.638889	9	5	19.1111	9	0.939324	208	0.527778
LL	2	g__EMP-G18	2.19355	0.0249971	0.455882	0.58498	23	4	19.8696	23	0.957373	1910	0.354037
LL	2	g__Roseburia	2.2043	0.010217	0.453659	0.638095	21	4	20.1429	21	0.956989	938	0.353383
LL	2	g__Prevotellaceae_UCG-003	2.41935	0.000858795	0.413333	0.884615	13	4	21.8462	13	0.949309	144	0.455128
LL	2	g__Anaerovorax	2.04301	0.0304669	0.489474	0.521739	24	4	21.1667	24	0.96275	2898	0.311275
LL	2	g__norank_f__p-251-o5	2.27957	0.0103812	0.438679	0.647368	20	4	20.25	20	0.954301	874	0.382075
LL	2	g__Anaeroplasma	2.15054	0.0293686	0.465	0.605263	20	4	20.15	20	0.958909	1668	0.330328
LL	2	g__Candidatus_Stoquefichus	2.09677	0.0164456	0.476923	0.572464	24	4	20.75	24	0.960829	1538	0.334677
LL	2	g__UCG-009	2.06452	0.0226707	0.484375	0.564103	27	4	20.2963	27	0.961982	1848	0.32736
LL	2	g__Monoglobus	2.1828	0.00924258	0.458128	0.65368	22	4	21.1818	22	0.957757	952	0.365204
LL	2	g__norank_f__norank_o__RF39	2.12903	0.0217326	0.469697	0.614286	21	4	21.1429	21	0.959677	1832	0.325275
LL	2	g__Agathobacter	2.17204	0.00375421	0.460396	0.774892	22	4	22.0909	22	0.958141	618	0.380878
LL	2	g__unclassified_c__Clostridia	2.17204	0.0149811	0.460396	0.601732	22	4	19.9545	22	0.958141	1412	0.338213
LL	2	g__unclassified_o__Oscillospirales	2.16129	0.0160168	0.462687	0.561265	23	4	19.7826	23	0.958525	1544	0.335298
LL	2	g__Candidatus_Soleaferrea	2.21505	0.0136582	0.451456	0.719298	19	4	21	19	0.956605	776	0.37406
LL	2	g__norank_f__norank_o__norank_c__Clostridia	2.03226	0.0266543	0.492063	0.550265	28	4	19.7143	28	0.963134	2184	0.312925
LL	2	g__norank_f__UCG-010	2.17204	0.00548264	0.460396	0.731602	22	4	21.4545	22	0.958141	908	0.369906
LL	2	g__norank_f__Eubacterium_coprostanoligenes_group	2.1828	0.0171653	0.458128	0.675889	23	4	20.5217	23	0.957757	1338	0.365683
LL	2	g__norank_f__norank_o__Clostridia_vadinBB60_group	2.09677	0.013457	0.476923	0.656667	25	4	21	25	0.960829	1666	0.33871
LL	2	g__norank_f__norank_o__Izemoplasmatales	2.12903	0.00555992	0.469697	0.747036	23	4	22.1739	23	0.959677	868	0.363507
LL	3	g__Alloprevotella	2.70968	0.0027022	0.369048	0.3	5	4	11	5	0.93894	144	0.3375
LL	3	g__Parabacteroides	3	0.00123513	0.333333	0	2	5	14	2	0.928571	60	0.5
LL	3	g__norank_f__Barnesiellaceae	2.72043	0.0108173	0.367589	0.1	5	4	7.8	5	0.938556	478	0.288
LL	3	g__Erysipelatoclostridium	2.67742	0.0144368	0.373494	0.1	5	4	7.8	5	0.940092	582	0.232258
LL	3	g__NK4A214_group	3.2043	0.00164148	0.312081	0	2	5	6.5	2	0.921275	46	0.5
LL	3	g__unclassified_f__Prevotellaceae	2.49462	0.0290766	0.400862	0.285714	8	4	12.75	8	0.946621	1450	0.293605
LL	3	g__norank_f__Ruminococcaceae	2.53763	0.00868883	0.394068	0.428571	7	4	14.5714	7	0.945084	520	0.346939
LL	3	g__Bacteroides	2.32258	0.0288405	0.430556	0.138889	9	4	9.66667	9	0.952765	1292	0.178197
LL	3	g__Prevotellaceae_UCG-001	2.62366	0.00700573	0.381148	0	4	4	11	4	0.942012	304	0.30303
LL	3	g__Candidatus_Saccharimonas	2.53763	0.00886481	0.394068	0.333333	6	4	10	6	0.945084	376	0.25
LL	3	g__UCG-004	2.41935	0.017073	0.413333	0.285714	8	4	13.375	8	0.949309	948	0.262255
LL	3	g__Syntrophococcus	2.46237	0.0117199	0.406114	0.357143	8	4	12.75	8	0.947773	466	0.274457
LL	3	g__Christensenellaceae_R-7_group	2.41935	0.0219033	0.413333	0.309091	11	4	11.6364	11	0.949309	936	0.242424
LL	3	g__unclassified_f__Bifidobacteriaceae	2.91398	0	0.343173	1	3	5	12	3	0.931644	0	0.48
LL	3	g__Family_XIII_AD3011_group	2.54839	0.0246323	0.392405	0.178571	8	4	8.625	8	0.9447	984	0.217105
LL	3	g__Eubacterium_brachy_group	2.41935	0.0150398	0.413333	0.345455	11	4	12.3636	11	0.949309	696	0.257576
LL	4	g__norank_f__p-2534-18B5_gut_group	2.39785	0.00341914	0.41704	0.555556	9	4	20.6667	9	0.950077	302	0.397436
LL	4	g__Prevotellaceae_UCG-004	2.09677	0.0215332	0.476923	0.4	15	4	18.4667	15	0.960829	1676	0.256481
LL	4	g__Eubacterium_oxidoreducens_group	2.52688	0.0164777	0.395745	0.361111	9	4	12.4444	9	0.945469	840	0.305556
LL	4	g__unclassified_f__Oscillospiraceae	2.44086	0.00449603	0.409692	0.511111	10	5	17.8	10	0.948541	328	0.356
LL	4	g__Fibrobacter	2.31183	0.00959135	0.432558	0.428571	7	4	16.7143	7	0.953149	602	0.27845
LL	4	g__Anaerovibrio	1.92473	0.0483526	0.519553	0.462963	28	4	20.6429	28	0.966974	4186	0.271617
LL	5	g__Bifidobacterium	3.31183	0.00297405	0.301948	0	2	5	6	2	0.917435	108	0.5
LL	5	g__norank_f__Eggerthellaceae	3.33333	0.00474569	0.3	0.333333	4	5	4.5	4	0.916667	166	0.354167
LL	5	g__norank_f__Bacteroidales_RF16_group	3.21505	0.00845196	0.311037	0.3	5	5	4.8	5	0.920891	274	0.3
LL	5	g__Anaerorhabdus_furcosa_group	2.75269	0.0164694	0.363281	0.4	5	5	9.2	5	0.937404	634	0.2875
LL	5	g__unclassified_k__norank_d__Bacteria	2.96774	0.00287659	0.336957	0	3	4	8	3	0.929724	122	0.388889
LL	5	g__norank_f__Oscillospiraceae	2.90323	0.013385	0.344444	0.266667	6	4	5.16667	6	0.932028	510	0.234848
LL	5	g__Negativibacillus	2.58065	0.011728	0.3875	0.4	5	4	14.6	5	0.943548	512	0.374359
LL	5	g__Pygmaiobacter	2.75269	0.0153288	0.363281	0.2	5	4	8.2	5	0.937404	786	0.275862
LL	5	g__Lachnospiraceae_UCG-004	2.52688	0.020893	0.395745	0.238095	7	4	9	7	0.945469	976	0.233083
LL	6	g__Ruminococcus	2.41935	0.00326268	0.413333	0.6	11	4	18.3636	11	0.949309	274	0.382576
LL	6	g__Marvinbryantia	1.97849	0.0497325	0.505435	0.406667	25	4	19.56	25	0.965054	4478	0.271667
LL	6	g__unclassified_p__Firmicutes	2.50538	0.0109152	0.399142	0.25	8	4	12.625	8	0.946237	644	0.284091
LL	6	g__unclassified_c__Bacteroidia	2.33333	0.0249799	0.428571	0.381818	11	4	14.4545	11	0.952381	1420	0.26281
LL	6	g__unclassified_o__Bacteroidales	2.36559	0.00601049	0.422727	0.511111	10	4	18.1	10	0.951229	652	0.329091
LL	6	g__Alistipes	2.12903	0.0163663	0.469697	0.457516	18	4	18.7222	18	0.959677	1790	0.288034
LL	6	g__Dorea	2.4086	0.0126574	0.415179	0.545455	11	4	17.1818	11	0.949693	804	0.356061
LL	6	g__norank_f__Paludibacteraceae	2.48387	0.00763849	0.402597	0.5	8	4	15.75	8	0.947005	522	0.357955
LL	6	g__Coprococcus	2.26882	0.0187366	0.440758	0.448718	13	4	15.6154	13	0.954685	1264	0.273954
LL	6	g__norank_f__Bifidobacteriaceae	2.21505	0.0203828	0.451456	0.409091	12	3	14.5833	12	0.956605	1102	0.239071
LL	7	g__Moryella	2.5914	0.00163843	0.385892	0.733333	6	4	18.6667	6	0.943164	126	0.478632
LL	7	g__Treponema	2.24731	0.0261614	0.444976	0.5	17	3	15.2353	17	0.955453	1396	0.287458
LL	7	g__unclassified_f__Rikenellaceae	2.67742	0	0.373494	1	5	4	18.4	5	0.940092	0	0.525714
LL	7	g__Olsenella	2.37634	0.0147099	0.420814	0.538462	14	4	16.1429	14	0.950845	932	0.343465
LL	7	g__UCG-005	2.39785	0.0057593	0.41704	0.772727	12	4	17.6667	12	0.950077	372	0.375887
LL	7	g__norank_f__norank_o__Bacteroidales	2.21505	0.0141599	0.451456	0.561404	19	4	17.1579	19	0.956605	1308	0.301016
LL	7	g__Cellulosilyticum	2.34409	0.0258408	0.426606	0.397436	13	4	13.5385	13	0.951997	1358	0.269231
LL	7	g__Romboutsia	2.30108	0.0117897	0.434579	0.538462	14	4	17	14	0.953533	888	0.303571
LL	7	g__unclassified_f__Peptostreptococcaceae	2.21505	0.0233044	0.451456	0.538095	21	4	15.8095	21	0.956605	1458	0.292769
LL	7	g__Lachnospiraceae_NK3A20_group	2.22581	0.0197467	0.449275	0.552381	21	4	16.1905	21	0.956221	1204	0.31044
LL	7	g__Eubacterium_nodatum_group	2.12903	0.0304375	0.469697	0.507353	17	4	17.2941	17	0.959677	1980	0.262032
LL	7	g__Howardella	2	0.0353988	0.5	0.450593	23	4	17.7391	23	0.964286	3004	0.249847
LL	7	g__unclassified_f__Anaerovoracaceae	2.22581	0.00874859	0.449275	0.660131	18	4	18.3889	18	0.956221	944	0.322612
LL	7	g__Frisingicoccus	2.44086	0.00214058	0.409692	0.758242	14	4	18.2857	14	0.948541	192	0.415584
LL	7	g__Eubacterium_hallii_group	2.03226	0.0256996	0.492063	0.529644	23	4	18.2609	23	0.963134	2684	0.26465
LL	7	g__Acetitomaculum	2	0.0573012	0.5	0.406926	22	3	16.3182	22	0.964286	3666	0.229834
LL	7	g__Paeniclostridium	2.03226	0.0276445	0.492063	0.52381	22	4	18.7727	22	0.963134	2796	0.264405
LL	7	g__Clostridium_sensu_stricto_1	2.43011	0.002911	0.411504	0.736264	14	4	17.3571	14	0.948925	288	0.385714
LL	7	g__Turicibacter	2.35484	0.00334232	0.424658	0.720588	17	4	17.6471	17	0.951613	372	0.367647
LL	7	g__Ruminococcus_gauvreauii_group	2.24731	0.0246499	0.444976	0.536842	20	4	15.9	20	0.955453	1536	0.3
LL	7	g__Mogibacterium	2.26882	0.0123857	0.440758	0.596491	19	4	16.6842	19	0.954685	974	0.32085

## Sheet:  Table S9 
Table S9. The relative abundances of rumen bacteria KEGG pathways level between HADG and LADG groups.
		LH%	LH-SD%	LL%	LL-SD%	P-value
KEGG level 1	Metabolism	77.98	0.3195	78.46	0.5908	0.0539
	Genetic Information Processing	8.845	0.0754	8.835	0.084	0.7913
	Environmental Information Processing	4.376	0.1969	4.084	0.3945	0.07566
	Cellular Processes	3.927	0.0786	3.819	0.175	0.05795
	Human Diseases	3.044	0.0414	3.05	0.0279	0.3075
	Organismal Systems	1.832	0.0343	1.85	0.0516	0.273
KEGG level 2 (Metabolism)	Global and overview maps	41.08	0.07368	41.19	0.1406	0.03415
	Carbohydrate metabolism	9.712	0.1999	9.785	0.2597	0.4916
	Amino acid metabolism	7.143	0.09084	7.227	0.119	0.09531
	Metabolism of cofactors and vitamins	4.536	0.09338	4.568	0.08858	0.4368
	Energy metabolism	4.317	0.04179	4.351	0.0507	0.1118
	Replication and repair	3.327	0.02596	3.327	0.02337	0.9853
	Nucleotide metabolism	2.995	0.04515	3.011	0.09045	0.6314
	Membrane transport	2.538	0.1548	2.425	0.2611	0.05899
	Glycan biosynthesis and metabolism	1.908	0.097	1.996	0.1944	0.2161
	Cellular community - prokaryotes	1.857	0.06331	1.781	0.1089	0.07536
KEGG level 3 (Global and overview maps)	Metabolic pathways	18.78	0.09596	18.93	0.1948	0.05013
	Biosynthesis of secondary metabolites	9.425	0.02475	9.454	0.04566	0.09582
	Biosynthesis of amino acids	4.438	0.0659	4.38	0.1067	0.1631
	Microbial metabolism in diverse environments	4.21	0.04	4.198	0.07098	0.6472
	Carbon metabolism	2.764	0.02474	2.778	0.01504	0.1477
	Photosynthesis	0.3876	0.008631	0.374	0.01039	0.05136
	Nitrogen metabolism	0.3803	0.01162	0.3781	0.005995	0.5934
	Biosynthesis of various secondary metabolites - part 2	0.08622	0.005446	0.08215	0.006283	0.1386
	Pathways in cancer	0.05485	0.003221	0.05515	0.002978	0.8287
	Longevity regulating pathway	0.02509	0.00581	0.029	0.006573	0.1751
KEGG level 3 (Carbohydrate metabolism)	Amino sugar and nucleotide sugar metabolism	1.186	0.03899	1.201	0.06901	0.5587
	Glycolysis / Gluconeogenesis	1.151	0.02826	1.163	0.03032	0.3626
	Starch and sucrose metabolism	0.9878	0.06555	0.9756	0.05012	0.6468
	Pyruvate metabolism	0.9661	0.024	0.9593	0.02834	0.5672
	Pentose phosphate pathway	0.7373	0.0146	0.7746	0.03041	0.05474
	Fructose and mannose metabolism	0.7323	0.04007	0.7385	0.05417	0.7752
	Galactose metabolism	0.6944	0.04771	0.7062	0.06853	0.6596
	Citrate cycle (TCA cycle)	0.6217	0.01849	0.653	0.02593	0.00614
	Butanoate metabolism	0.6045	0.01305	0.6162	0.02606	0.2179
	One carbon pool by folate	0.5939	0.01483	0.6141	0.03101	0.08027
KEGG level 3 (Amino acid metabolism)	Cysteine and methionine metabolism	1.103	0.01561	1.095	0.0316	0.4653
	Alanine, aspartate and glutamate metabolism	1.019	0.02198	1.036	0.03738	0.223
	Glycine, serine and threonine metabolism	0.9988	0.01526	1.01	0.0127	0.09842
	Phenylalanine, tyrosine and tryptophan biosynthesis	0.8974	0.009658	0.891	0.0158	0.2923
	2-Oxocarboxylic acid metabolism	0.8559	0.0211	0.8543	0.02601	0.8803
	Glyoxylate and dicarboxylate metabolism	0.7324	0.02593	0.7581	0.01397	0.1286
	Lysine biosynthesis	0.604	0.01637	0.596	0.01162	0.2283
	Arginine biosynthesis	0.5172	0.006078	0.5185	0.007043	0.6605
	Valine, leucine and isoleucine biosynthesis	0.4626	0.01284	0.4584	0.01475	0.5042
	Histidine metabolism	0.4473	0.01269	0.4512	0.0181	0.5823
KEGG level 3 (Metabolism of cofactors and vitamins)	Oxidative phosphorylation	1.154	0.01066	1.161	0.01281	0.1862
	Fatty acid metabolism	0.6492	0.01478	0.647	0.02525	0.8131
	Propanoate metabolism	0.6201	0.01835	0.6201	0.01337	0.9936
	Butanoate metabolism	0.6165	0.01336	0.6136	0.00966	0.5846
	Valine, leucine and isoleucine degradation	0.2763	0.01418	0.2773	0.02059	0.9086
	Nitrogen metabolism	0.3125	0.009282	0.31	0.01202	0.6069
	Glycerolipid metabolism	0.289	0.01326	0.2916	0.02217	0.7602
	Sulfur metabolism	0.2806	0.006937	0.2796	0.006719	0.7563
	Central carbon metabolism in cancer	0.216	0.003515	0.2185	0.005049	0.2157
	Phenylalanine metabolism	0.1961	0.004578	0.1951	0.005412	0.6674
SD, standard deviation. P-Values between LH and LL were calculated using t-test.

## Sheet: Table S10 
Table S10. The relative abundances of rectum bacteria KEGG pathways level1 between HADG and LADG groups.
		LH%	LH-SD%	LL%	LL-SD%	P-value
KEGG level 1	Metabolism	76.96	0.1672	76.89	0.2374	0.4408
	Genetic Information Processing	8.899	0.08144	8.938	0.1045	0.363
	Environmental Information Processing	4.909	0.1499	4.905	0.1793	0.9559
	Cellular Processes	4.187	0.07134	4.215	0.1214	0.5352
	Human Diseases	3.221	0.04148	3.229	0.05164	0.7239
	Organismal Systems	1.822	0.03614	1.824	0.04838	0.9272
KEGG level 2 (Metabolism)	Global and overview maps	40.82	0.08738	40.8	0.0729	0.6718
	Carbohydrate metabolism	9.508	0.1027	9.46	0.1239	0.3544
	Amino acid metabolism	7.394	0.06427	7.412	0.06184	0.5197
	Energy metabolism	4.268	0.02916	4.257	0.03744	0.4951
	Metabolism of cofactors and vitamins	4.215	0.03474	4.222	0.04691	0.716
	Translation	3.824	0.04225	3.849	0.05174	0.2613
	Replication and repair	3.278	0.02808	3.291	0.03084	0.3455
	Nucleotide metabolism	2.824	0.0421	2.832	0.03285	0.6482
	Membrane transport	2.712	0.1362	2.704	0.1877	0.9142
	Signal transduction	2.197	0.03966	2.201	0.05963	0.8665
KEGG level 3 (Global and overview maps)	Metabolic pathways	18.26	0.06089	18.24	0.08766	0.5032
	Biosynthesis of secondary metabolites	9.25	0.02835	9.253	0.04503	0.8774
	Biosynthesis of amino acids	4.514	0.05258	4.522	0.04542	0.7033
	Microbial metabolism in diverse environments	4.302	0.02252	4.304	0.02794	0.8863
	Carbon metabolism	2.854	0.03352	2.852	0.03499	0.9007
	2-Oxocarboxylic acid metabolism	0.9408	0.01105	0.9401	0.01903	0.9187
	Starch and sucrose metabolism	0.9367	0.04672	0.9291	0.06797	0.7744
	Pentose phosphate pathway	0.7779	0.01545	0.7762	0.01528	0.8025
	Methane metabolism	0.7216	0.003828	0.7243	0.007587	0.3231
	Glyoxylate and dicarboxylate metabolism	0.7004	0.003205	0.6957	0.009267	0.1535
KEGG level 3 (Carbohydrate metabolism)	Glycolysis / Gluconeogenesis	1.136	0.009017	1.137	0.00911	0.8433
	Amino sugar and nucleotide sugar metabolism	1.079	0.02039	1.075	0.02088	0.6448
	Pyruvate metabolism	1.06	0.01917	1.061	0.02615	0.9536
	Starch and sucrose metabolism	0.9367	0.04672	0.9291	0.06797	0.7744
	Pentose phosphate pathway	0.7779	0.01545	0.7762	0.01528	0.8025
	Glyoxylate and dicarboxylate metabolism	0.7004	0.003205	0.6957	0.009267	0.1535
	Galactose metabolism	0.6118	0.03372	0.6053	0.04457	0.7177
	Fructose and mannose metabolism	0.612	0.02244	0.599	0.02288	0.2142
	Carbon fixation in photosynthetic organisms	0.5441	0.003499	0.5436	0.004832	0.8041
	Pentose and glucuronate interconversions	0.2955	0.01541	0.2898	0.01648	0.4325
KEGG level 3 (Amino acid metabolism)	Cysteine and methionine metabolism	1.133	0.02262	1.139	0.01235	0.4497
	Glycine, serine and threonine metabolism	0.9894	0.00583	0.9899	0.01293	0.9169
	Alanine, aspartate and glutamate metabolism	0.9714	0.006748	0.9701	0.009531	0.7382
	2-Oxocarboxylic acid metabolism	0.9408	0.01105	0.9401	0.01903	0.9187
	Phenylalanine, tyrosine and tryptophan biosynthesis	0.8573	0.007535	0.8592	0.007595	0.5959
	Lysine biosynthesis	0.6104	0.007754	0.6141	0.01083	0.3929
	Arginine biosynthesis	0.5294	0.004346	0.5313	0.006309	0.4539
	Valine, leucine and isoleucine biosynthesis	0.4934	0.006371	0.4935	0.007992	0.9924
	Histidine metabolism	0.4855	0.007426	0.4877	0.01014	0.5955
	Arginine and proline metabolism	0.3772	0.005602	0.3783	0.003754	0.6249
KEGG level 3 (Metabolism of cofactors and vitamins)	Porphyrin and chlorophyll metabolism	0.7968	0.04155	0.7783	0.09188	0.5681
	Pantothenate and CoA biosynthesis	0.6162	0.0078	0.621	0.007767	0.1823
	Thiamine metabolism	0.5135	0.01662	0.5137	0.01312	0.975
	Nicotinate and nicotinamide metabolism	0.5029	0.01227	0.4975	0.02333	0.5186
	Folate biosynthesis	0.4857	0.04168	0.488	0.03474	0.8932
	Biotin metabolism	0.3427	0.01919	0.3451	0.01799	0.7807
	Selenocompound metabolism	0.2987	0.009552	0.3057	0.01148	0.1569
	Riboflavin metabolism	0.2415	0.01109	0.2393	0.01474	0.7088
	Vitamin B6 metabolism	0.2188	0.01487	0.2235	0.01863	0.5399
	Ubiquinone and other terpenoid-quinone biosynthesis	0.1753	0.04592	0.1911	0.05144	0.4784
SD, standard deviation. P-Values between LH and LL were calculated using t-test.

[truncated: 5 more sheets: Table S11 , Table S12 , Table S13  , Table S14 , Table S15]
